# Supplementary material
Source: MDPI journal article supplement (https://www.mdpi.com/2071-1050/9/1/30)
Supplement: s1 [file s1]

## Sheet: Outlook
Review 1	Sustainability integration in fashion operations
Topic	From A Systematic Literature Review to A Classification Framework: Sustainability Integration in Fashion Operations
Target Journal	Sustainability
Main Concepts	Social Sustainability
	Environmental Sustainability
	Supply Chain and Operations
Keywords	'fashion industry'' AND ''product OR process OR supply chain''
Inclusion Criteria	Databases	Scopus
	Years	2006-2016
	Type	Peer-reviewed journal articles, review
Exclusion	Newspapers, conference papers, theses, textbooks, unpublished papers
Final Search	Phase 0	Keyword identification
	Phase 1	Abstract / titles
	Phase 2	Full texts		Selection: Relevance to fashion operations
	Phase 3	Full texts		Selection: Relevance to any kind of sustainability practices in fashion operations
	Final Phase	Identification of environmental and social sustainability practices in fashion operations
Abstracts & Titles	Phase 1	Phase 2	Phase 3	Final
Scopus	232	147	38	Classification Framework
2016	7	6
2015	27	17	5
2014	23	20	11
2013	23	16	5
2012	29	21	8
2011	13	9	5
2010	15	9	1
2009	17	10	2
2008	30	16	1
2007	22	11
2006	26	15
	232	147	38

## Sheet: Article Details
Article	Year	Country	Journal	Methodology Employed
A fast fashion safety-first inventory model	2010	China	Textile Research Journal	Model
A Five-R analysis for sustainable fashion supply chain management in Hong Kong: a case analysis	2012	China	Journal of Fashion Marketing and Management	Case
A two-stage fuzzy-AHP model for risk assessment of implementing green initiatives in the fashion supply chain green initiatives in the fashion supply chain	2011	China	International Journal of Production Economics	Model
Aligning critical success factors to organizational design A study of Swedish textile and clothing firms	2011	Finland / Sweden	Business Process Management Journal	Survey
An examination of the product development process for fashion remanufacturing	2015	Sri Lanka / the UK	Resources, Conversation and Recycling	Case
Challenges and Solutions of Sustainable Apparel Product Development: A Case Study of Eileen Fisher	2012	the USA	Clothing and Textiles Research Journal	Case
Competitive priorities and supply chain strategy in the fashion industry	2013	Korea	Qualitative Market Research: An International Journal	Interviews
Corporate Social Responsibility in Garment Sourcing Networks: Factory Management Perspectives on Ethical Trade in Sri Lanka	2014	the UK	Journal of Business Ethics	Case
Conceptual framework development CSR implementation in fashion supply chains	2012	the UK	International Journal of Physical Distribution & Logistics Management	Case
Corporate sustainability reporting in the apparel industry An analysis of indicators disclosed	2014	Canada	International Journal of Productivity and Performance Management	Content analysis
Exploring the influence of national cultural context on CSR implementation	2012	the UK	Journal of Fashion Marketing and Management	Case
Enhancing Economic Sustainability by Markdown Money Supply Contracts in the Fashion Industry: China vs U.S.A.	2015	China	Sustainability	Case
Environmental and Social Impact of Fashion: Towards an Eco-friendly, Ethical Fashion	2015	India	International Journal of Interdisciplinary and Multidisciplinary Studies	Review
Environmental sustainability in fashion supply chains:An exploratory case based research	2011	Italy	International Journal of Production Economics	Case
From Garment to Fashion Production: An Analysis of the Evolution of the Apparel Industry in Brazil	2013	Brazil	Brazilian Administration Review	Review
Governance of sustainable supply chains in the fast fashion industry	2014	China	European Management Journal	Case
Impacts of Returning Unsold Products in Retail Outsourcing Fashion Supply Chain: A Sustainability Analysis	2015	China	Sustainability	Model
Key Success Factors for Organizational Innovation in the Fashion Industry	2013	Italy	International Journal of Engineering Business Management	Model
Knowledge sharing among green fashion communities online	2012	Monaco	Journal of Fashion Marketing and Management	Content analysis
Mapping Corporate Responsibility and Sustainable Supply Chains: an Exploratory Perspective	2012	France	Business Strategy and the Environment	Statistical analysis based on data
Practices for Environmental Sustainability in the Textile, Clothing and Leather Sectors: The Italian Case	2014	Italy	International J. of Opers. and Quant. Management	Review
Profit Analysis and Supply Chain Planning Model for Closed-Loop Supply Chain in Fashion Industry	2014	Korea	Sustainability	Model
Redefining supply network strategies to face changing environments. A study from the fashion and luxury industry	2015	Italy	Operations Management Research	Case
Reference model for collaborative manufacturing of customised products: applications in the fashion industry	2014	Portugal	Production Planning & Control	Model
Risk and benefits brought by formal sustainability programs onfashion enterprises under market disruption	2014	China	Resources, Conversation and Recycling	Statistical analysis based on data
Multi-period risk minimization purchasing models for fashion products with interest rate, budget, and profit target considerations	2013	China	Annual Operations Research	Model
Rhetoric and argument in social and environmental reporting: the Dirty Laundry case	2014	Ireland / the UK	Accounting, Auditing & Accountability Journal	Case
Sustainable Fashion Supply Chain: Lessons from H&M	2014	China	Sustainability	Case
Sustainable fashion supply chain management under oligopolistic competition and brand differentiation	2011	the USA	International Journal of Production Economics	Model
Sustainable Rent-Based Closed-Loop Supply Chain for Fashion Products	2014	China	Sustainability	Review
Sustainable supply chain management in the fast fashion industry: An analysis of corporate reports	2014	Turkey	European Management Journal	Content analysis
A tough pill to swallow? The impact of voluntary occupational health and safety management system on firms’ financial performance in fashion and textiles industries	2012	China	Journal of Fashion Marketing and Management	Statistical analysis based on data
The integration between marketing and purchasing in the traceability process	2009	Italy	Industrial Marketig Management	Case
The Role of Corporate Sustainability in a Low-Cost Business Model – A Case Study in the Scandinavian Fashion Industry	2013	Denmark	Business Strategy and the Environment	Case
The shaping of environmental impacts from Danish production and consumption of clothing	2012	Denmark	Ecological Economics	Case
The transparency of SCM ethics: conceptual framework and empirical illustrations	2009	Norway	Supply Chain Management: An International Journal	Case
Towards a sustainable fashion retail supply chain in Europe: Organisation and performance	2008	France	International Journal of Production Economics	Interviews
Using System Dynamics to assess the impact of RFID technology on retail operations	2011	Italy	International Journal of Production Economics	Model

## Sheet: Main Concepts
The main theoretical concepts
Environmental proactivity
Corporate social responsibility
Strategic purchasing and supply
Product based green supply
Greening the supply process
Path dependancy and learning
Resource acquisition
Capability development
Factors enabling and supporting sustainability
Learning processes and knowledge
Operational resources
Stakeholder management
